# Supplementary material
Source: Springer Nature journal article supplement (https://www.springermedizin.de/resource/supplementary/12889_2012_4694_MOESM4_ESM.pdf/9493574)
Supplement: MOESM4 [file 9493574]

**Table 3: Vaccination coverage and vaccine combination by age. Lyon area, October 2010 - February 2011**

| Vaccinations given within 10 years | N =225 | Non-vaccinated subjects<br>n (% yes) [CI 95% of %] | Vaccinated subjects<br>n (% yes) [CI 95% of %] | p*    |
|------------------------------------|--------|----------------------------------------------------|------------------------------------------------|-------|
| <b>Diphtheria</b>                  |        |                                                    |                                                |       |
| 20-40 years                        | 34     | 9(26.5) [13.8-43.1]                                | 25(73.5)[56.9-86.3]                            | 0.001 |
| 41-60 years                        | 61     | 21(34.4)[23.3-46.9]                                | 40(65.6)[53.0-76.7]                            |       |
| 61-80 years                        | 105    | 49(46.7)[37.3-56.2]                                | 56(53.3)[43.7-62.7]                            |       |
| >80 years                          | 25     | 16(64.0)[44.1-80.8]                                | 9(36.0)[19.2-57.5]                             |       |
| <b>Tetanus</b>                     |        |                                                    |                                                |       |
| 20-40 years                        | 34     | 9(26.5)[13.8-43.1]                                 | 25(73.5)[56.9-86.3]                            | 0.83  |
| 41-60 years                        | 61     | 14(23.0)[13.7-34.7]                                | 47(77.0)[65.3-86.3]                            |       |
| 61-80 years                        | 105    | 14(13.3)[7.8-20.8]                                 | 91(86.7)[79.1-92.2]                            |       |
| >80 years                          | 25     | 11(44.0)[25.7-63.6]                                | 14(56.0)[36.4-74.3]                            |       |
| <b>Polio</b>                       |        |                                                    |                                                |       |
| 20-40 years                        | 34     | 9(26.5)[12.9-44.4]                                 | 25(73.5)[55.6-87.1]                            | 0.005 |
| 41-60 years                        | 61     | 18(29.5)[18.5-42.6]                                | 43(70.5)[57.4-81.5]                            |       |
| 61-80 years                        | 105    | 39(37.1)[27.9-47.1]                                | 66(62.9)[52.9-72.1]                            |       |
| >80 years                          | 25     | 16(64.0)[42.5-83.0]                                | 9(36.0)[17.9-57.5]                             |       |
| <b>Pertussis</b>                   |        |                                                    |                                                |       |
| 20-40 years                        | 34     | 30(88.2)[72.6-96.7]                                | 4(11.8)[3.3-27.5]                              | 0.34  |
| 41-60 years                        | 61     | 54(88.5)[77.8-95.3]                                | 7(11.5)[4.7-22.2]                              |       |
| 61-80 years                        | 105    | 92(87.6)[79.7-93.3]                                | 13(12.4)[6.7-20.3]                             |       |
| >80 years                          | 25     | 25(100)                                            | 0(0)                                           |       |
| <b>dTP**</b>                       |        |                                                    |                                                |       |
| 20-40 years                        | 34     | 9 (26.5)[13.8-43.1]                                | 25 (73.5)[56.9-86.3]                           | 0.01  |
| 41-60 years                        | 61     | 21 (34.4)[23.3-46.9]                               | 40 (65.6)[53.0-76.7]                           |       |
| 61-80 years                        | 105    | 51 (48.6)[39.1-58.1]                               | 54 (51.4)[41.9-60.9]                           |       |
| >80 years                          | 25     | 16 (64.0)[44.1-80.8]                               | 9 (36)[19.2-57.5]                              |       |
| <b>Tetanus alone</b>               |        |                                                    |                                                |       |
| 20-40 years                        | 34     | 34 (100.0)                                         | 0 (0)                                          | 0.01  |
| 41-60 years                        | 61     | 56 (91.8)[82.8-96.3]                               | 5 (8.2)[2.7-18.1]                              |       |
| 61-80 years                        | 105    | 77 (73.3)[64.3-81.1]                               | 28 (26.7)[18.9-35.7]                           |       |
| >80 years                          | 25     | 20 (80.0)[61.1-92.3]                               | 5 (20)[6.8-40.7]                               |       |

\* Statistical difference between those who are vaccinated and those who are not

\*\* diphtheria, Tetanus and Poliomyelitis combined
